# Supplementary material for: The Gene ANTHER DEHISCENCE REPRESSOR (ADR) Controls Male Fertility by Suppressing the ROS Accumulation and Anther Cell Wall Thickening in Arabidopsis
Source: PubMed Central journal article supplement (PMC6434047; doi:10.1038/s41598-019-41382-z), 2019-03-25
Supplement: 41598_2019_41382_MOESM2_ESM.pdf [file 41598_2019_41382_MOESM2_ESM.pdf]

**The Gene *ANTHER DEHISCENCE REPRESSOR (ADR)*  
Controls Male Fertility by Suppressing the ROS  
Accumulation and Anther Cell Wall Thickening in  
*Arabidopsis***

Shu-Yu Dai<sup>1</sup>, Wei-Han Hsu<sup>1</sup> and Chang-Hsien Yang<sup>1,2\*</sup>

<sup>1</sup>Institute of Biotechnology,

<sup>2</sup>Advanced Plant Biotechnology Center,  
National Chung Hsing University,  
Taichung, Taiwan 40227 ROC

\* To whom correspondence should be addressed  
E-mail: [chyang@dragon.nchu.edu.tw](mailto:chyang@dragon.nchu.edu.tw)

```

ADR      : MGGSTSKDERNSSKRRIRKVKANEQ-R-RRETRELEDEKERVILALKMAE
At3g23930 : MGGCTSKQERRGV-RSVKETSKDQSRGRRHLIKERDEREKVMFLQLKEAE

ADR      : TEWRKERKRLREEVKRLRQKMEEEKKEGKA---KQHE-WEWVVEQMCLERA
At3g23930 : REWRKERKRLREEVRLRKLLEEREAKTTTTEEREYWKWVVEEMCVERA

ADR      : VREEAVERWKQLYFAIKNELDDLI-HTTY--GEALRQKP---QEEV---A
At3g23930 : VRDEAVEKWKQLYLAIKNELDHLISHTTSSSGEAIMQRKLEEQEEETEBA

ADR      : KAVQELRKEVKARGETIETLKGRIINLMEKQONGKEREIDLLRQSLRILGG
At3g23930 : KRVEVLRDEVRVKKEETVETLEEQIVLMDRQKYEKEREIDLLRQSLRILG-

ADR      : SSGKNKALSSTTRNLTVFKTKFIGCK
At3g23930 : SKKKKKTGSFASMNLLILKTKCVECT

```

**Supplementary Figure S1.** Protein sequence comparison of *Arabidopsis* ADR and ADR-like gene At3g23930.

Protein sequence comparison of ADR (At4g13540) and other *Arabidopsis* ADR-like proteins (At3g23930). The ADR protein contains a predicted recognition site for N-myristoylase (in the blue box), N-terminal basic residues (in the red box) and a predicted binding site for a peroxisomal targeting signal (in the green box). Dashes were introduced to improve alignment. The amino acid sequences were aligned by the BIOEDIT program (<http://www.mbio.ncsu.edu/BioEdit/bioedit.html>) using CLUSTALW MULTIPLE ALIGNMENT with default parameters.

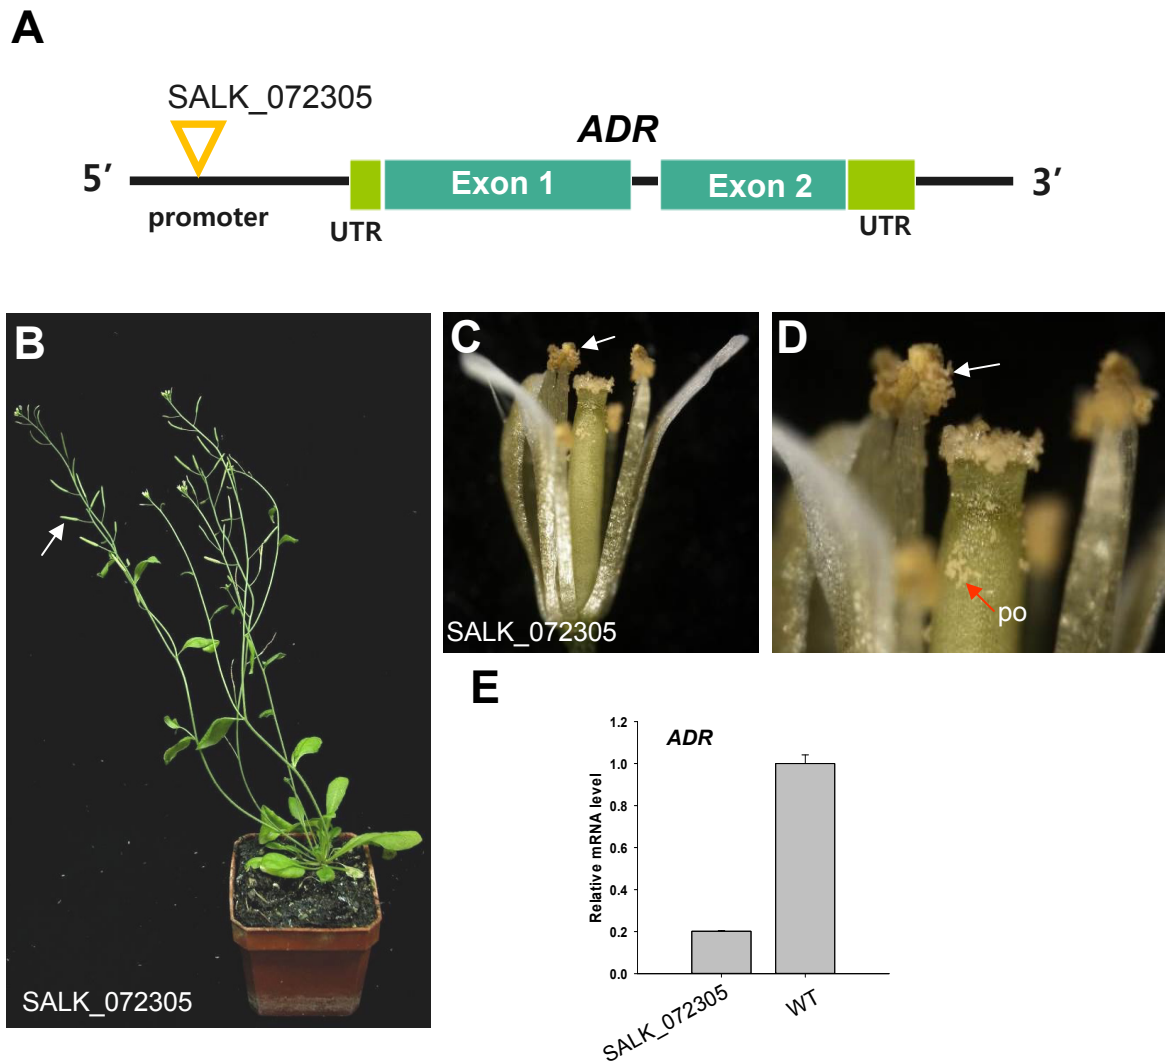

**Supplementary Figure S2.** Phenotypic analysis and the detection of gene expression in *ADR* T-DNA insertion line SALK\_072305.

**(A)** Genomic region of *ADR*. Green boxes and blue boxes represent UTR and exons for *ADR* cDNA, respectively. Triangle indicates the location of T-DNA insertion in promoter region in SALK\_072305 mutants.

**(B)** A 40-day-old SALK\_072305 plant was phenotypically indistinguishable from wild-type plants and produced long, well-developed siliques (arrowed).

**(C)** Dehiscent anthers (arrowed) were observed in SALK\_072305 flowers.

**(D)** Close-up of the SALK\_072305 dehiscent anthers (arrowed) with released pollen (po) from (C).

**(E)** Detection of *ADR* expression in SALK\_072305 mutant and wild-type (WT) Arabidopsis. mRNA accumulation for *ADR* was determined by real-time quantitative PCR. Gene expression level in SALK\_072305 plant is presented relative to that of the wild-type plant, which was set at 1.

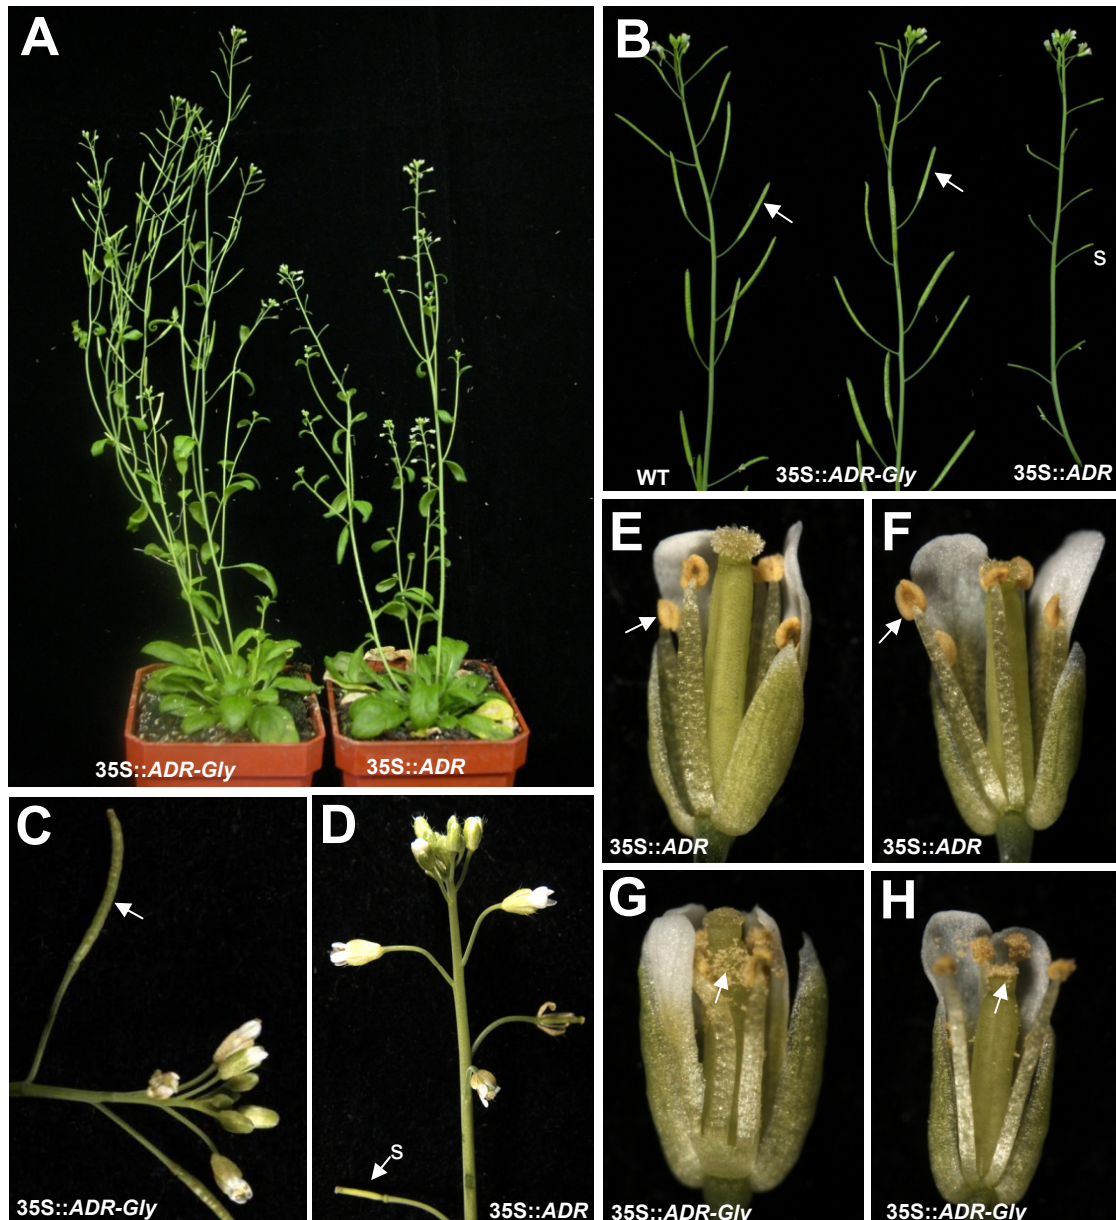

**Supplementary Figure S3.** Phenotypic analysis of *Arabidopsis* plants ectopically expressing *ADR-Gly* or *ADR*.

(A) A 46-day-old *35S::ADR-Gly* plant (left) produced long, well-developed siliques similar to those of wild-type plants, whereas *35S::ADR* plants produced short, undeveloped siliques (right).

(B) Inflorescences with elongated siliques (arrowed) from a wild-type plant (WT, left) and a *35S::ADR-Gly* plant (middle), with short and undeveloped siliques (s) from a *35S::ADR* plant (right).

(C) Close-up of a *35S::ADR-Gly* inflorescence with flowers that developed into well-elongated siliques (arrowed).

(D) Close-up of a *35S::ADR* inflorescence with short and undeveloped siliques (s).

(E, F) Anthers (arrowed) of *35S::ADR* flowers remained indehiscent at stage 13 (E) and stage 15 (F).

(G, H) Anthers of *35S::ADR-Gly* flowers were completely dehiscent, and pollen (arrowed) was released at stage 13 (G) and stage 15 (H).

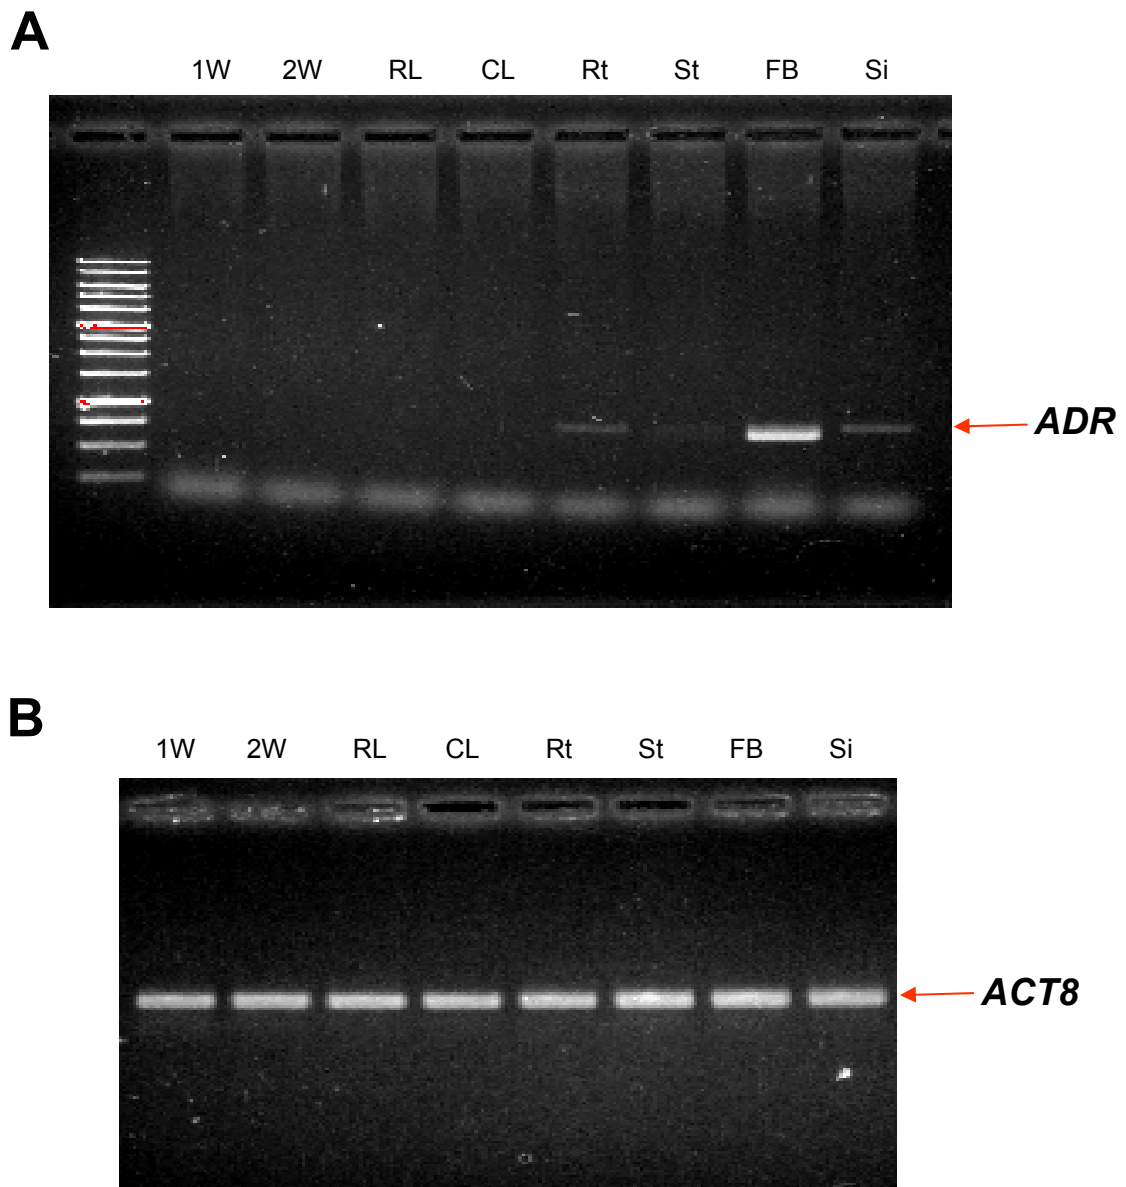

**Supplementary Figure S4.** Analysis of *ADR* expression in different *Arabidopsis* organs. **(A)** The original gel for the detection of *ADR* expression in different *Arabidopsis* organs. The mRNA levels were determined by RT-PCR. Total RNA was isolated from 1-week-old seedlings (1W), 2-week-old seedlings (2W), rosette leaves (RL), cauline leaves (CL), roots (Rt), stems (St), floral buds (FB) and siliques (Si). **(B)** The original gel for the detection of *Arabidopsis ACTIN8 (ACT8)* gene which was used as internal controls.

**Supplemental Table S1.** Oligo nucleotide sequence of primers used in gene cloning and PCR analysis.

|                 | Primer name    | Primer sequence                      | Restriction site | Use                     |
|-----------------|----------------|--------------------------------------|------------------|-------------------------|
| ADR-real-time   | ADR-real-For   | 5'-GAGGAAAGAGAGGAAGAGACTGAG-3'       |                  | Real-time PCR           |
|                 | ADR-real-Rev   | 5'-ACATCTGTTCCACGACCCATTC-3'         |                  |                         |
| UBQ10-real-time | RT-UBQ10-1     | 5'-CTCAGGCTCCGTGGTGGTATG-3'          |                  | Real-time PCR           |
|                 | RT-UBQ10-2     | 5'-GTGATAGTTTTCCAGTCAACGTC-3'        |                  |                         |
| ADR:GUS         | pADR-For       | 5'-CTGCAGACCATCTGATTCTTGTATTGTC-3'   | PstI             | ADR Promoter cloning    |
|                 | pADR-Rev       | 5'-TCTAGAGAAGAAAAGCTCTCTTTCTCTCTC-3' | XbaI             |                         |
| 35S:ADR+GFP     | ADR-dsc-For.   | 5'-CTGCAGTCTTCATGGGTGGTTCTACAAG-3'   | PstI             | GFP C-ter fusion        |
|                 | ADR-dsc-Rev.   | 5'-GGTACCTTTACACCCGATGAATTTTGT-3'    | KpnI             |                         |
| 35S:CAT3+mORG2  | CAT3-For       | 5'-TCAACCTTCTAGAATCACCATGGA-3'       | XbaI             | mORG2 C-ter fusion      |
|                 | CAT3-dsc-Rev   | 5'-GGTACCGATGCTTGGCCTCACGT-3'        | KpnI             |                         |
| NST1            | NST1-For       | 5'-GCTTAACGGACCCACATCATATTC-3'       |                  | Real-time PCR           |
|                 | NST2-Rev       | 5'-TACGGAGATCGGACGGAAGG-3'           |                  |                         |
| NST2            | NST2-For       | 5'-CGCCGTCGTTCAATGAGGAG-3'           |                  | Real-time PCR           |
|                 | NST2-Rev       | 5'-TCGTGATGGTGGTGTGTTATGG-3'         |                  |                         |
| ACT8            | ACT8-For       | 5'-ATGAAGATTAAGGTCGTGGCACC-3'        |                  | RT-PCR                  |
|                 | ACT8-Rev       | 5'-TTATCCGAGTTTGAAGAGGCTACAA-3'      |                  |                         |
| 35S::ADR        | ADR-cDNA-For   | 5'-TCTAGAGAGAGAAAGAGAGCTTTTCTTC-3'   | XbaI             | cDNA cloning and RT-PCR |
|                 | ADR-cDNA-Rev   | 5'-GGTACCGAAGCTTACTGAGTCTACTTAT-3'   | KpnI             |                         |
| 35S::ADR-Gly    | ADR-dsc-dG-For | 5'-CTGCAGCTTTTCTTCATGTCTACAAG-3'     | PstI             | cDNA cloning            |
|                 | ADR-cDNA-Rev   | 5'-GGTACCGAAGCTTACTGAGTCTACTTAT-3'   | KpnI             |                         |
